# Supplementary material
Source: Springer Nature journal article supplement (https://www.springermedizin.de/resource/supplementary/12968_2009_945_MOESM2_ESM.pdf/9580012)

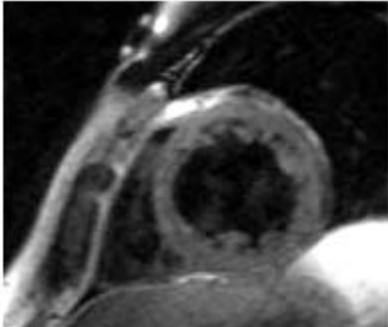

a

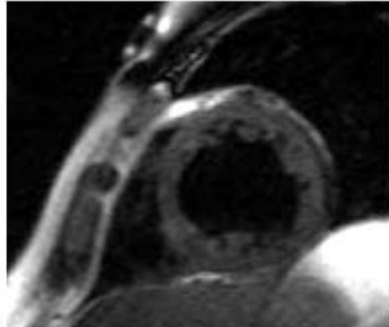

b

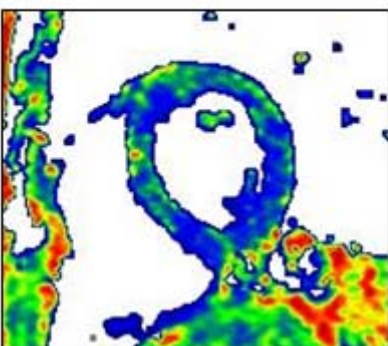

c

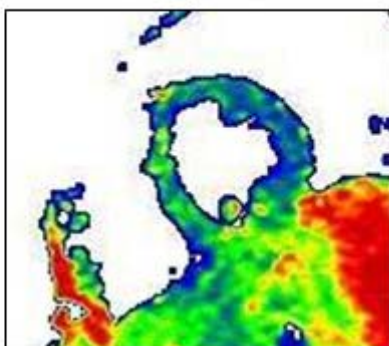

d

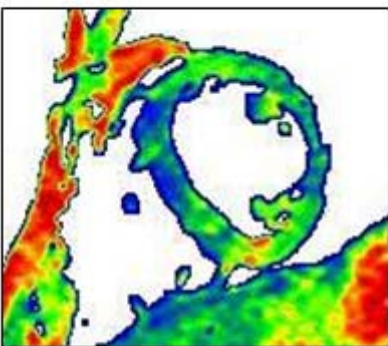

e

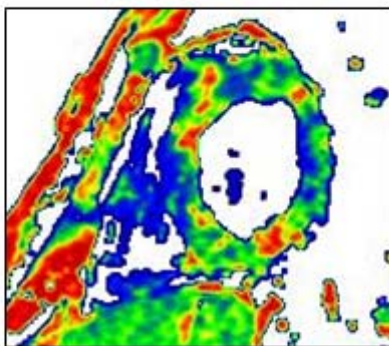

f

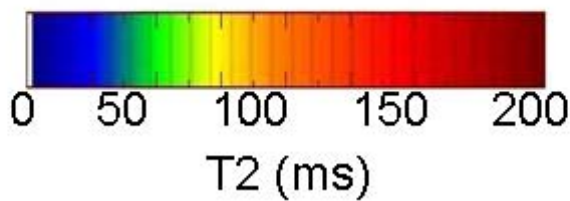

0

50

100

150

200

T2 (ms)

Supplement: MOESM2 [file 9580012]
